# Supplementary material for: Degradation of tri(2-chloroethyl)phosphate by a microwave enhanced heterogeneous Fenton process using iron oxide containing waste
Source: Royal Society of Chemistry journal article supplement (doi:10.1039/c8ra02911c), 2018-01-01
Supplement: c8ra02911c1.pdf [file c8ra02911c1.pdf]

## SUPPORTING INFORMATION

**Degradation of tri (2-chloroethyl) phosphate by microwave enhanced  
heterogeneous Fenton process using iron oxide containing waste**

*Lingzhi Du\**, *Xianli Wang* and *Junfeng Wu\**□

*(Henan University of Urban Construction, Henan Province Key Laboratory of  
Water Pollution Control and Rehabilitation Technology, Pingdingshan, Henan  
467036, China)*

\* Corresponding author. Tel.: +86 375 2089079

*E-mail addresses:* [wjfhncj2015@163.com](mailto:wjfhncj2015@163.com) (J.F. Wu)

**Table S1.** The physical and chemical properties of the iron ore tailings after the eighth reuse cycles.

|                                                                     |                                                    |                                           |
|---------------------------------------------------------------------|----------------------------------------------------|-------------------------------------------|
| <b>The physical properties</b>                                      | Surface area(m <sup>2</sup> g <sup>-1</sup> ): 1.2 | pH: 5.31                                  |
|                                                                     | (%) Sand (2000-50 μm): 70.01                       | (%) Silt (50-2 μm): 26.16                 |
|                                                                     | (%) Clay (<2 μm): 3.83                             | -                                         |
| <b>The chemical composition (percentage referred to oxide form)</b> | (%) Fe <sub>2</sub> O <sub>3</sub> : 65.72         | (%) SiO <sub>2</sub> : 10.73              |
|                                                                     | (%) CaO: 9.10                                      | (%) ZnO: 4.44                             |
|                                                                     | (%) MgO: 1.96                                      | (%) K <sub>2</sub> O: 1.02                |
|                                                                     | (%) Al <sub>2</sub> O <sub>3</sub> : 1.05          | (%) SO <sub>3</sub> : 0.968               |
|                                                                     | (%) P <sub>2</sub> O <sub>5</sub> : 0.844          | (%) Cl: 0.68                              |
|                                                                     | (%) CuO: 0.58                                      | (%) BaO: 0.421                            |
|                                                                     | (%) Cr <sub>2</sub> O <sub>3</sub> : 0.432         | (%) MoO <sub>3</sub> : 0.42               |
|                                                                     | (%) MnO: 0.432                                     | (%) TiO <sub>2</sub> : 0.277              |
|                                                                     | (%) Nd <sub>2</sub> O <sub>3</sub> : 0.308         | (%) Sb <sub>2</sub> O <sub>3</sub> : 0.29 |
|                                                                     | (%) V <sub>2</sub> O <sub>5</sub> : 0.18           | (%) ZrO <sub>2</sub> : 0.16               |

**Table S2.** The intermediate products of TCEP degraded by microwave enhanced heterogeneous Fenton process using iron oxide containing waste.

| No. | EI-MS spectrum ions                                                                                       | Possible structure                                                                   |
|-----|-----------------------------------------------------------------------------------------------------------|--------------------------------------------------------------------------------------|
| 1   | 93 (999); 95 (366); 73 (321); 137 (232); 103 (156); 139 (82); 43 (75); 94 (75); 101 (69); 45 (66)         | 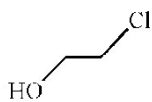  |
| 2   | 211 (999); 255 (305), 133 (273); 73 (249); 270 (199); 212 (149), 45 (132); 135 (117), 227 (117); 75 (107) |   |
| 3   | 147 (999); 73 (546); 191 (240); 66 (195); 103 (185); 148 (161); 45 (98); 149 (82); 59 (62); 74 (57)       |   |
| 4   | 299 (999); 73 (288); 300 (242); 314 (184); 301 (132); 147 (108); 45 (95); 283 (57); 207 (50); 211 (47)    |   |
| 5   | 73 (999); 147 (615); 45 (183); 148 (101); 74 (95); 66 (94); 43 (74); 72 (70); 75 (66); 190 (60)           |  |
